1 Protease-controlled secretion and display of intercellular signals

2 Alexander E. Vlahos<sup>1</sup>, Jeewoo Kang<sup>2</sup>, Carlos A. Aldrete<sup>1</sup>, Ronghui Zhu<sup>3</sup>, Lucy S. Chong<sup>3,4</sup>,  
3 Michael B. Elowitz<sup>3</sup>, and Xiaojing J. Gao<sup>1,2\*</sup>

4  
5 1) Department of Chemical Engineering, Stanford University, Stanford, CA, 94305

6 2) Neurosciences Interdepartmental Program, Stanford University, Stanford, CA, 94305

7 3) Howard Hughes Medical Institute, Division of Biology and Biological Engineering, California  
8 Institute of Technology, Pasadena, CA 91125,

9 4) Current address:

10

11 \*Corresponding author: [xjgao@stanford.edu](mailto:xjgao@stanford.edu)

12

13

14

15

16

17

18

19

20

21

22

23

24

25

26

27

28

29

30

31

32

33

34

35

36

37

38

39

40

41

42

43

44

45

46

47

48

49

50 **Keywords:** Intercellular communication, synthetic biology, proteases, protein secretion, KRAS,  
51 protease-based signalling

52 **Abstract:**

53 To program intercellular communication for biomedicine, it is crucial to regulate the secretion  
54 and surface display of signaling proteins. If such regulations are at the protein level, there are  
55 additional advantages, including compact delivery and direct interactions with endogenous  
56 signalling pathways. We created a modular, generalizable design called **Retained Endoplasmic  
57 Cleavable Secretion (RELEASE), with engineered proteins retained in the endoplasmic  
58 reticulum and displayed/secreted in response to specific proteases. The design allows  
59 functional regulation of multiple synthetic and natural proteins by synthetic protease circuits to  
60 realize diverse signal processing capabilities, including logic operation and threshold tuning. By  
61 linking RELEASE to additional novel sensing and processing circuits, we were able to achieve  
62 elevated protein secretion in response to “undruggable” oncogene KRAS mutants. RELEASE  
63 should enable the local, programmable delivery of intercellular cues for a broad variety of fields  
64 such as neurobiology, cancer immunotherapy and cell transplantation.**

65

66

67

68

69

70

71

72

73

74

75

76

77

78 **Introduction:**

79 Synthetic biology aspires to create biomolecular circuits that can sense the state of cells,  
80 process the information, and then deliver therapeutic outputs accordingly<sup>1,2</sup> This vision has been  
81 enhanced by the creation of protein-based circuits by others<sup>3-6</sup> and ourselves<sup>7</sup>. Protein-based  
82 circuits have advantages such as fast operation, compact delivery, and robust, context-  
83 independent performance compared to traditional transcriptional circuits<sup>6,7</sup>. However, these  
84 protein circuits have operated in the cytosol, and there remains an urgent need for a design that  
85 enables protein-level control of intercellular communication, often required at the “respond” step  
86 in “sense-process-respond”.

87 Cell-cell communication is widespread<sup>8-10</sup> and essential for diverse biological processes,  
88 such as the generation of immunological responses<sup>11,12</sup>, cell differentiation and tissue  
89 development<sup>13-15</sup>, the maintenance of physiological homeostasis<sup>16</sup>, and cancer development<sup>17,18</sup>.  
90 Intercellular communication is typically implemented by secreted molecules, including hormones  
91 and cytokines. To take cancer immunotherapy as an example, there an ideal application would  
92 be introducing a protein circuit that sense the cancerous state of a cell, secrete  
93 immunostimulatory signals with temporal and quantitative precision to mobilize the immune  
94 system while lysing the cell, and therefore turn these cells into vaccines against other similarly  
95 cancerous cells. This would not only avoid the toxic effects associated with the systemic  
96 delivery of immunomodulating proteins<sup>19,20</sup>, but also match the complex, dynamic immune  
97 process we are trying to control<sup>21</sup>. In contrast, of the current local delivery methods<sup>22</sup>, neither  
98 nanoparticle<sup>23</sup>, or biomaterial-based<sup>24</sup> delivery platforms can fulfill the aforementioned functions  
99 that circuits can deliver.

100 Given the importance of intercellular communication, we sought to interface protein  
101 circuits with the secretion and display of protein signals. Specifically, because protease activity  
102 has emerged as a “common currency” of protein circuits that responds to synthetic and  
103 endogenous inputs<sup>6,7,25-28</sup>, it will be ideal to directly control protein secretion using proteases. To

104 design a modular protease-regulated protein secretion system, we adapted aspects of the  
105 natural secretion process. Secreted proteins are typically transported into the Endoplasmic  
106 Reticulum (ER), processed in the Golgi apparatus, and finally secreted at the plasma  
107 membrane. Some proteins contain signaling motifs (e.g., KDEL for soluble proteins<sup>29</sup> and the  
108 cytosol-facing dilysine (-KKXX) or -RXR motifs for membrane proteins<sup>30-34</sup>) recognized in the  
109 early Golgi apparatus, causing the protein to be retrieved, transported retrogradely, and retained  
110 in the ER<sup>32,35</sup>. Other ER-resident proteins, such as cytochrome p450 are retained in at the ER  
111 via their signal-anchor transfer sequence<sup>36,37</sup>. These retention motifs function in their  
112 endogenous contexts as well as when fused to normally secreted proteins<sup>30,33</sup>. To place ER  
113 retention under protease control, we engineered the modular **R**etained **E**ndoplasmic **C**leavable  
114 **S**ecretion (RELEASE) platform, compatible with both protein secretion and the surface display  
115 of membrane proteins. We validated and optimized the core mechanism of RELEASE, created  
116 input-processing capabilities, and then used RELEASE to control physiological outputs. Finally,  
117 we combined RELEASE with novel sensing and processing components to respond to internal  
118 cell states and external signals via engineered receptors. This study demonstrates a novel  
119 protein-level control module to directly regulate protein secretion that is compatible with pre-  
120 existing protein components to program therapeutic circuits for cancer immunotherapy and  
121 transplantation in the future.

122

## 123 **Results:**

### 124 **Engineering RELEASE for protein secretion and expression:**

125 RELEASE contains 4 components: a luminal facing linker containing a furin  
126 endoprotease cut site, a transmembrane anchor domain<sup>38</sup>, a cytosolic linker containing a  
127 protease cleavage site, and an ER retention motif (**Fig. 1a, 1b**). On the cytosolic face, the  
128 retention motif ensures that the tagged protein is actively transported back to ER<sup>39,40</sup>, a process  
129 only aborted after the motif is removed by a proteases such as tobacco etch virus protease

130 (TEVP)<sup>6,7</sup>. On the luminal face, soluble proteins are initially tethered to the membrane through  
131 the linker and thus coupled to the cytosolic ER retention signal<sup>7</sup>. After the first cytosolic cleavage  
132 event, the membrane-tethered protein is processed into its soluble form through cleavage by  
133 furin in the trans-Golgi apparatus (furin is absent in cis-Golgi or ER)<sup>41</sup> (**Fig. 1a**), and finally  
134 secreted.

135 First, to validate the effectiveness of the retention motif, we fused it to secreted  
136 embryonic alkaline phosphatase (SEAP)<sup>42</sup>, and used a dilysine-lacking mutant motif as the  
137 negative control. We transfected human embryonic kidney (HEK) 293 cells using DNA plasmids  
138 encoding the constructs. Using RELEASE, SEAP is minimally present in the supernatant and  
139 comparable to control cells that were not transfected with SEAP (**Fig. 1c**). Mutation of the  
140 dilysine motif of RELEASE significantly increases SEAP secretion (**Fig. 1c**). We next placed the  
141 dilysine motif under the control of TEVP, and showed that the co-expression of TEVP  
142 significantly increases SEAP secretion (**Fig. 1d – left panel**). By switching the cytosolic  
143 protease cut sites, we validated RELEASE against other orthogonal proteases such as the  
144 hepatitis C virus protease (HCVP) (**Fig. 1d – right panel**) and the tobacco mottling vein virus  
145 protease (TVMVP) (**Supplementary Fig. 1a, b**). Furthermore, the design is compatible with  
146 alternative ER-retention motifs, as we validated constructs using the N-terminal signal anchor  
147 sequence from p450<sup>36,37</sup> (**Supplementary Figure 2a, b**).

148 In anticipation of tuning RELEASE for different applications, we next explored how its  
149 performance is affected by two design decisions. First, as an alternative to the tri-  
150 transmembrane domain<sup>38</sup>, we created a single transmembrane variant, and found it more  
151 sensitive to TEVP compared to the tri-transmembrane construct (**Fig. 1e**). Similarly, the input  
152 sensitivity of HCVP-inducible RELEASE is also modulated by the choice of the transmembrane  
153 domain (**Fig. 1f**). Furthermore, by using a protein linker containing the native residues that flank  
154 the HCVP cut site<sup>38,43</sup>, we made more sensitive HCVP-inducible RELEASE constructs (**Fig. 1f –**  
155 **red and green lines**) than the original versions that use synthetic flanking sequences. A

156 complete list of the cleavage efficiencies for the RELEASE variants are in **Supplementary**  
157 **Table 1**. We took advantage of this tunability to reduce RELEASE response to the input-  
158 independent activity of a membrane-localized split protease<sup>44</sup> (**Supplementary Fig. 3a**) and  
159 therefore improve output dynamic range (**Supplementary Fig. 3b, c**).

160 In addition to controlling protein secretion, cells can communicate by changing the  
161 display of proteins on their surface<sup>12,13</sup>. By removing the furin cut site in RELEASE, we  
162 hypothesized it could control the surface display of proteins (**Fig. 1g**). To validate this strategy,  
163 membrane-bound green fluorescent protein (GFP) fused to RELEASE was transfected into  
164 HEK293 cells, and the cell surface was stained using an anti-GFP antibody. GFP-RELEASE  
165 constructs significantly increased surface display of GFP in response to the cognate proteases  
166 (**Fig. 1h**). Taken together, these results show that RELEASE is a suitable approach to control  
167 the secretion and surface display of proteins in response to protease activity (**Fig. 1d, h**).

168  
169 RELEASE is compatible with circuit-level functions:

170 After validating the RELEASE design, our next goal was to ensure that its activation  
171 could be programmed using protease-based circuits, either pre-existing<sup>6,7</sup> or novel. For  
172 RELEASE to operate properly in circuits with multiple proteases, first it is important to validate  
173 the orthogonal control of RELEASE by the selected protease<sup>7</sup>. Indeed, cells simultaneously  
174 transfected with two RELEASE constructs (**Fig. 2a**) were orthogonal and only secreted the  
175 respective reporter protein in response to the cognate protease (**Fig. 2b**). This result  
176 demonstrates that two proteases can be used to independently regulate secretion of distinct  
177 target proteins in the same cell.

178 In addition to the parallel regulation of multiple outputs, another useful capability is the  
179 integration of multiple inputs. Logic operation is crucial for integrating multiple signals,  
180 previously implemented for protease circuits using degrons<sup>7</sup> or coiled-coiled (CC) dimerization  
181 domains<sup>6</sup>. RELEASE enables the compact implementation of Boolean logic directly at the

182 retention level. To implement OR, two protease cut sites were inserted in tandem into the  
183 cytosolic linker so that the retention motif is removed by either protease (**Fig. 2c**). To implement  
184 AND, a RELEASE complex was created containing the N-terminal p450 signal anchor sequence  
185 and the C-terminal dilysine motif, each alone conferring sufficient ER retention (**Fig. 2d**). For  
186 SEAP to be secreted, both motifs must be removed (**Fig. 2d**). We attributed the reduced  
187 secretion in the AND gate construct due to the use of the N-terminal signal anchor sequence  
188 (**Supplementary Fig. 2b**), which confers retention by directly inserting into the ER  
189 membrane<sup>36,37</sup> rather than retention through retrograde transport<sup>31,32</sup>. Both gates function as  
190 expected (**Fig. 2c, 2d**). We also implemented an alternative approach for AND (**Supplementary**  
191 **Fig. 4**)<sup>45,46</sup>.

192 Other than processing signals on its own, can RELEASE be coupled to other protease  
193 circuits? We used protease-activated protease as an example of such circuits<sup>6</sup>. We used CC  
194 domains to associate split protease halves with complementary catalytically-inactive halves  
195 (**Fig. 2e**), ‘caging’ them by preventing the active halves from associating with each other. Cut  
196 sites were incorporated adjacent to (or within) the linker regions, allowing the input protease to  
197 remove the inhibitory domains. Following removal of the autoinhibitory portion, the  
198 complementary CC domains of the functional split protease halves would then associate and  
199 reconstitute protease activity (**Fig. 2e**). Using this approach, we created a two-protease  
200 cascade, in which TEVP activates TVMVP, which in turn cleaves the TVMVP-inducible  
201 RELEASE. This circuit increased SEAP secretion in response to TEVP, while maintaining  
202 strong retention in the absence of TEVP (**Fig. 2f**). This highlights the modularity of the  
203 RELEASE design and the ability to engineer additional functionality into it.

204

#### 205 RELEASE controls biologically relevant proteins:

206 Many cytokines are pleiotropic and their systemic administration would cause serious  
207 adverse effects, so controlling their local expression with RELEASE would be advantageous for

208 tumor immunotherapy<sup>19</sup>. We selected interleukin 12 p70 (referred to as IL-12), because it is a  
209 immunomodulatory cytokine important for T-cell activation and proliferation<sup>47,48</sup>. IL-12 is  
210 composed of two obligatory subunits (p35 and p40)<sup>49</sup>, so we fused the two subunits with a  
211 flexible linker<sup>19,50</sup> and then with RELEASE (**Fig. 3a**). As expected, TVMVP significantly  
212 increases IL-12 secretion (**Fig. 3b**).

213 As for controlling membrane proteins, we chose the Kir2.1 potassium channel as an  
214 example of (**Fig. 3c**), because it is a powerful tool in neurobiology<sup>51,52</sup> and a well-characterized  
215 model membrane protein. A protease-controlled Kir2.1 would enable the conditional silencing of  
216 neurons based on their intracellular states or extracellular cues, e.g., therapeutic silencing of the  
217 most active neurons during a seizure without the side effects of conventional methods that exert  
218 indiscriminate silencing. Unlike secreted proteins, Kir2.1 has cytosolic motifs that directs its  
219 transport in the secretory pathway, posing unique challenges for RELEASE and serving as a  
220 test case for its future adaptation to other membrane proteins. To measure the surface display  
221 of Kir2.1, a hemagglutinin (HA) epitope was incorporated into its extracellular loop<sup>34</sup>. Initial  
222 experiments fusing Kir2.1 with the standard RELEASE construct resulted in leaky display of  
223 Kir2.1 in the absence of TEVP (**Supplementary Fig. 5**). We reasoned that it is because Kir2.1  
224 has a long cytosolic tail, and that the dilysine motif is the most effective when positioned closely  
225 to the ER membrane<sup>30,34</sup>. In contrast, another ER retention motif, RXR, is most effective when  
226 positioned distally from the membrane<sup>34</sup>. Indeed, a RELEASE construct using the RXR motif,  
227 improved retention (**Supplementary Fig. 5**), and successfully controlled its surface display  
228 using TEVP (**Fig. 3d**).

229 Kir2.1 functions as a homo-tetramer<sup>53</sup>, provoking the question of whether the RELEASE  
230 system could interfere with tetramerization and consequently channel function (**Fig. 3c**). Surface  
231 display of functional Kir2.1 leads to efflux of potassium ions and hyperpolarization<sup>53</sup>, providing a  
232 metric we can use to assess the its functionality. We used two reporters to measure changes in  
233 membrane potential: ASAP3<sup>54</sup> and DiSBAC<sub>2</sub>(3)<sup>55</sup>. ASAP3 is a genetically encoded voltage



234 indicator<sup>54</sup> that increases fluorescence as cells become hyperpolarized, while DiSBAC<sub>2</sub>(3) is a  
235 chemical dye that decrease cell entry and therefore fluorescence intensity upon  
236 hyperpolarization<sup>56</sup>. When Kir2.1 RELEASE was co-expressed with ASAP3, we observed a  
237 significant increase in fluorescence intensity in response to TEVP (**Fig. 3e**), suggesting Kir2.1  
238 was functional. The chemical dye DiSBAC<sub>2</sub>(3) showed similar results (**Fig. 3f**), and the observed  
239 change in median fluorescent intensity was indicative of a 30 mV change in membrane  
240 potential<sup>55</sup>. Thus RELEASE-regulated Kir2.1 maintains its functionality.

241

#### 242 RELEASE responds to oncogenic inputs:

243 One of the most compelling cases for protein circuits is therapy against recalcitrant  
244 cancers. The RAS family of proteins (HRAS, KRAS, and NRAS) provide a remarkable  
245 example.<sup>57,58</sup> The activating RAS mutations have been implicated in a multitude of hard-to-treat  
246 cancers such as pancreatic ductal adenocarcinoma<sup>57-59</sup> and non-small lung cancer<sup>60</sup>. The  
247 pharmacological targeting of RAS has been challenging<sup>61-63</sup>. We envision a “circuit as medicine”  
248 alternative, where an intracellularly introduced circuit interrogates the cancerous state of a cell,  
249 and conditionally lyses RAS-mutant cells, while programming cytokine secretion to activate a  
250 broader local immune response.

251 As a first step towards that vision, we hypothesized that we could exploit protein  
252 interaction during RAS signaling to activate RELEASE. RAS resides in the cell membrane<sup>64,65</sup>,  
253 and activated RAS recruits to the membrane effector proteins such as Raf<sup>65-67</sup>. To sense active  
254 RAS, we fused the N- and C-terminal halves of split TEVP to the RAS-binding domain (RBD) of  
255 Raf (**Fig. 4a**). The increased local concentration of the RBD-split TEVP sensor in response to  
256 activated RAS, along with their transition from the 3D cytosol to the more restrictive 2D  
257 membrane, was expected to facilitate the association of the protease halves through their  
258 residual mutual affinity<sup>64</sup>.

259 Building on our previous constructs sensing the RAS pathway<sup>7</sup>, we performed initial  
260 experiments using HRAS-G12V and the RBD-split TEVP sensor, and observed a minimal  
261 increase of SEAP secretion when regulated by TEVP-responsive RELEASE (**Supplementary**  
262 **Fig. 6**). Since HRAS-G12V reconstitutes RBD-split TEVP at the cell membrane, and cleavage of  
263 RELEASE occurs at the ER, we hypothesized that additional protease components would be  
264 required to propagate the signal from the cell membrane to the ER (**Fig. 4a**). Using the caged  
265 TVMVP intermediate protease (**Fig. 2d, 4b – topology 1**) did not improve SEAP secretion in  
266 response to HRAS-G12V, so we further hypothesized that spatial localization of the  
267 intermediate protease might be required to increase signal transduction. We first tried to  
268 increase the cleavage of the intermediate protease by bringing it closer to the TEVP input,  
269 fusing the C-terminal membrane transfer CAAX motif<sup>68</sup> (**Supplementary Fig. 7a – left panel**) to  
270 one half of the caged split TVMVP (**Fig. 4b – topology 2**), but this did not improve SEAP  
271 secretion (**Fig. 4c**). We then also increased the possibility for the reconstituted intermediate  
272 protease to activate RELEASE, by fusing the uncaged other half of TVMVP with the signal  
273 anchor sequence of cytochrome p450 and therefore targeting it to the ER membrane (**Fig. 4b –**  
274 **topology 3**). This resulted in the greatest SEAP secretion in response to HRAS-G12V (**Fig. 4c**).  
275 After titrating down the ER-bound uncaged half of TVMVP, we reduced background and  
276 improved dynamic range (**Supplementary Fig. 7b**).

277 We then generalized the design to KRAS, the most frequently mutated RAS in cancer<sup>69</sup>.  
278 We validated that our circuit responds very similarly to KRAS-G12V and HRAS-G12V  
279 (**Supplementary Fig. 7c**), probably because RAS isoforms share up to 90% homology in the  
280 region where RBD binds<sup>61,70</sup>. As a control, the split TEVP sensor fused to the RBD mutant  
281 (R89L), which has a reduced affinity to activated RAS<sup>64,67</sup>, did not significantly increase SEAP  
282 secretion in response to HRAS-G12V or KRAS-G12V (**Fig. 4e**).

283 We reasoned that the choice of cell membrane-localization domains might affect  
284 baseline, because post-translational modification of CAAX initially inserts the protein at the ER

285 membrane<sup>71</sup>, which could facilitate TVMVP reconstitution in the absence of TEVP inputs. To  
286 further reduce the background of the RAS sensor, we additionally tested the N-terminal  
287 membrane anchoring portion of the SH4 domain of Lyn and Fyn tyrosine kinases<sup>72</sup>, the cell  
288 membrane-targeting of which bypasses ER<sup>72</sup>. The Lyn and Fyn motifs reduced background  
289 SEAP secretion relative to the CAAX motif (**Supplementary Fig. 7d**), and enabled increased  
290 SEAP secretion without significantly increasing the background (**Supplementary Fig. 7e**).

291 The complete circuit is summarized in **Figure 4d**. We observed that the circuit was  
292 responsive to the oncogenic state of KRAS, since cells secreted significantly more SEAP when  
293 co-expressed with active mutants of KRAS (**Fig. 4e – blue bar, Supplementary Fig. 7g**)  
294 compared to wildtype KRAS (**Fig. 4e – green bar**), and endogenous wildtype KRAS (**Fig. 4e –**  
295 **red bar**). The oncogenic state of KRAS also resulted in a much smaller and statistically  
296 insignificant increase in SEAP secretion when using the RBD-split TEVP R89L mutant (**Fig. 4e**).

297

#### 298 Plug-and-play capabilities of RELEASE:

299 In addition to building towards RAS detection, our RAS-centric engineering efforts also  
300 established a plug-and-play protein circuit framework. RELEASE, in conjunction with CHOMP  
301 and other protease components, enables the detection of any input that can be converted to  
302 dimerization or proteolysis. This signal can then be processed by RELEASE itself or other  
303 protease circuits to control the display or secretion of proteins (**Fig. 5a**).

304 As a proof of principle, we used the well-established MESA receptor (membrane-  
305 localized split TEVP reconstituted by rapalog)<sup>25,26,73</sup> as an input to activate RELEASE via the  
306 intermediate protease circuit optimized above (**Fig. 4c**). Switching the input components to the  
307 rapalog MESA receptor, we increased SEAP secretion in response to rapalog (**Fig. 5b**). We  
308 also used RELEASE to control the secretion of IL-12 in response to mutant KRAS (**Fig. 5c**) or  
309 rapalog (**Fig. 5d**), and to control the surface display of Kir2.1 by rapalog (**Fig. 5e**).

310           The processing protease circuit is also modular. Specific applications of RELEASE may  
311 require a greater dynamic range or more complex dynamic secretion patterns that can be  
312 achieved by incorporating additional orthogonal proteases<sup>6,7</sup>. For example, to improve the  
313 dynamic range of the RAS-sensing circuit, we incorporated a previously established positive  
314 feedback loop based on reciprocal inhibition between TVMVP and HCVP to tune the level  
315 TVMVP<sup>7</sup> (**Fig. 5f**). When input was low, or not present, HCVP would inactivate the “baseline”  
316 reconstitution of TVMVP by removing the complementary CC domain (**Fig. 5f – top panel**).  
317 However, when there was sufficient input (KRAS-G12V<sup>+</sup> cells), the reconstituted TVMVP would  
318 override HCVP by removing its activating co-peptide (**Fig. 5f – bottom panel**). By varying the  
319 amount of HCVP transfected, we reduced the background activity and increased the dynamic  
320 range of the engineered cells containing the complete RAS circuit (**Fig. 5g**). These results  
321 demonstrate the possibility of tuning RELEASE with additional proteases and eventually creating  
322 more complex responses.

323

#### 324 **Discussion:**

325           Here, we introduced the generalized protease-responsive platform RELEASE to control  
326 the secretion and display of proteins (**Fig. 1**). RELEASE is compatible with protein-level circuit  
327 operations (**Fig. 2**), and enables plug-and-play control of various outputs (Figs. 3, 5) using a  
328 variety of inputs (Fig. 4, 5). For all these examples, we simply switched the input and output  
329 (RELEASE) components, while keeping the intermediate protease chassis intact – without any  
330 re-optimization. This highlights the modularity of using protease-based sensors, protease  
331 circuits, and RELEASE to engineer sense-and-response capabilities.

332           When adapting RELEASE for new applications, all one needs is a protein-mediated  
333 dimerization event that could be harnessed to reconstitute protease activity (**Fig. 4a, 5a**). We  
334 can therefore tap into additional synthetic receptors platforms that rely on ligand-induced  
335 dimerization, such the Generalized Extracellular Molecule Sensor (GEMS)<sup>42</sup>, or Tango<sup>74</sup>. In this

336 work we demonstrate that one can use intermediate proteases to propagate protease signal  
337 from the cell membrane to the ER to activate RELEASE (Fig. 4a), suggesting that using  
338 alternative motifs may allow for signal propagation from other subcellular locations, such as  
339 nucleus or mitochondria, to ER. Because the components of the conventional protein secretion  
340 pathway are conserved among different cell types and species, we expect RELEASE to function  
341 in these different contexts as well.

342 RELEASE enables novel therapeutic modalities. For example, we hypothesize that we  
343 can use the KRAS-sensing circuit (**Fig. 4c**) to selectively express immunostimulatory signals  
344 (such as IL-12, surface T-cell engagers, and anti-PD1) to mark cancer cells for T-cell mediated  
345 destruction without affecting normal cells<sup>19</sup>. The selectivity of the circuit will be further improved  
346 using additional proteases through quantitative thresholding (**Fig. 5g**) or logic operations. For  
347 the latter, many RAS-driven cancers harbour additional mutations to tumor suppressor proteins,  
348 such as p53<sup>75</sup>. One could use split proteases fused to nanobodies<sup>4,7</sup> that have preferential  
349 binding to mutant p53<sup>75</sup>, to activate RELEASE only when both mutant KRAS and mutant p53  
350 are simultaneously present, via AND logic (**Fig. 2c**). An additional benefit is that the protease  
351 circuit components can be encoded within single mRNA transcripts<sup>76</sup> that do not pose the risk of  
352 insertional mutagenesis.

353 RELEASE will also expedite other potential therapeutic applications in fields as diverse  
354 as neurobiology, developmental biology, immunology, tissue engineering, and transplantation,  
355 to name a few. To take a third and last example, in addition to the cancer immunotherapy and  
356 neuronal silencing applications discussed above, RELEASE can be used to create sense-and-  
357 respond cells to control immunomodulating cytokines and growth factors important for graft  
358 acceptance, such as IL-10<sup>77</sup> and TGF- $\beta$ <sup>20</sup>, which cannot normally be delivered systemically due  
359 to their pleiotropic and off-target effects. Co-delivering these engineered cells with therapeutic  
360 cells, such as pancreatic islets may be a suitable approach create engineered tissue implants  
361 that can engraft without the need for systemic immunosuppression. The proposed plug-and-play

362 sense and secretion components using RELEASE would allow for the programming of such  
363 communications with unprecedented specificity and precision.

364

365 **Acknowledgments:** We would like to thank Dr. Lin, and Dr. Leonard for kindly sharing some of  
366 their plasmids that were used in this work. We would also like to thank Leo Scheller for  
367 providing the protocol for the SEAP assays. This work was funded by NIH (4R00EB027723-02,  
368 X.J.G), Stanford Cancer Institute (Cancer Innovation Award, X.J.G.), Stanford SystemX Alliance  
369 (Seed Grant, X.J.G.), NSERC (PDF-557516-2021, A.E.V.), the International Human Frontier  
370 Science Program Organization (LT000221/2021-L, A.E.V.), and the Stanford Graduate  
371 Fellowship (J. K. and C. A.).

372

373 **Author Contributions:** A.E.V. and X.J.G. conceived and directed the study. A.E.V, J.K, and  
374 C.A. performed most of the experiments. X.J.G. created the HRAS-sensing protease, and L.S.C  
375 and R.Z. created the protease-activated protease under M.B.E.'s supervision. A.E.V, and J.K.  
376 analysed the data for the manuscript. A.E.V., J.K. and X.J.G. wrote the manuscript. All authors  
377 provided feedback on the manuscript.

378

379 **Materials and Methods:**

380

381 **Plasmid generation:**

382 All plasmids were constructed using general practices. Backbones were linearized via  
383 restriction digestion, and inserts were generated using PCR, or purchased from Twist  
384 Biosciences. MESA-rapalog receptor source plasmids were a generous gift from Joshua  
385 Leonard<sup>26</sup>. The plasmid containing the voltage indicator, ASAP3 was a generous gift from  
386 Michael Lin<sup>54</sup>. A complete list of plasmids used in this study can be found in **supplementary**  
387 **table 2**, and all maps will be deposited on Addgene after publication.

388

389 **Tissue culture:**

390 Flp-In™ T-REx™ Human Embryonic Kidney (HEK) 293 cells were purchased from  
391 Thermo Scientific (Catlog# R78007). Cells were cultured in a humidity-controlled incubator  
392 under standard culture conditions (37°C with 5% CO<sub>2</sub>) in Dulbecco's Modified Eagle Medium  
393 (DMEM), supplemented with 10% fetal bovine serum (FBS - Fisher Scientific; catalog#  
394 FB12999102), 1 mM sodium pyruvate (EMD Millipore; catalog# TMS-005-C), 1X Pen-Strep  
395 (Genesee; catalog# 25-512), 2 mM L-glutamine (Genesee, catalog# 25-509) and 1X MEM non-  
396 essential amino acids (Genesee; catalog# 25-536). To induce expression of transiently  
397 transfected plasmids, 100 ng/mL of Doxycycline was added at the time of transfection. Rapalog  
398 AP21967 (also known as A/C heterodimerizer, purchased from Takara Biosciences; catalog#  
399 635056) is a synthetic rapamycin analog that can bind with FRB harboring the T2098L mutation,  
400 and is designed not to interfere with the native mTOR pathway<sup>78</sup>. All our constructs in this study  
401 using the FRB protein contain the T2098L mutation and were induced with 100 nM of rapalog,  
402 unless otherwise stated.

403

404 **Transient transfections:**

405 HEK 293T cells were cultured in either 24-well or 96-well tissue culture-treated plates  
406 under standard culture conditions. When cells were 70-90% confluent, the cells were transiently  
407 transfected with plasmid constructs using the jetOPTIMUS® DNA transfection Reagent  
408 (Polyplus transfection, catalog# 117-15), as per manufacturer's instructions.

409

410 **Measuring protein secretion:**

411 Secreted Alkaline Phosphatase (SEAP) Assay was performed as previously described<sup>42</sup>.  
412 Briefly, following two days after transient transfection, the supernatant was collected without  
413 disrupting the cells and heat inactivated at 70°C for 45 minutes. Following heat inactivation, 10-

414 40  $\mu$ L of the supernatant was mixed with dH<sub>2</sub>O for a final volume of 80  $\mu$ L, and then mixed with  
415 100  $\mu$ L of 2X SEAP buffer (20 mM homoarginine (ThermoFisher catalog# H27387), 1 mM  
416 MgCl<sub>2</sub>, and 21% (v/v) dioethanolamine (ThermoFisher, catalog# A13389)) and 20  $\mu$ L of the p-  
417 nitrophenyl phosphate (PNPP, Acros Organics catalog# MFCD00066288) substrate (120 mM).  
418 Samples were measured via kinetic measurements (1 measurement/min) for a total of 30  
419 minutes at 405 nm using a SpectraMax iD3 spectrophotometer (Molecular Devices).

420 Secreted GFP was measured by incubating cell-free supernatant with cells displaying  
421 the Gbp6 GFP-binding nanobody, with mCherry fused to its cytosolic tail as a co-transfection  
422 marker. Captured GFP was used to quantify changes in the amount of secreted GFP in  
423 response to protease expression.

424 To measure the amount of secreted IL-12, cell-free supernatant was collected and  
425 quantified using the Human IL-12p70 DuoSet ELISA (R&D Systems; catalog# DY1270), as per  
426 the manufacturer's instructions.

427

#### 428 **Flow Cytometry and data analysis:**

429 Two days after transient transfection, cells were harvested using FACS buffer (HBSS +  
430 2.5 mg/mL of Bovine Serum Albumin (BSA)). For experiments requiring antibody staining,  
431 surface GFP was measured by incubating cells with a 1:1000 dilution of anti-GFP Dylight 405  
432 antibody (ThermoFischer; catalog# 600-146-215) in FACS buffer for one hour at 4°C. For  
433 experiments measuring the surface display of Kir2.1, cells were incubated with 1:500 dilution of  
434 anti-hemagglutinin antibody (HA, Abcam; catalog# ab137838), followed by incubation with a  
435 donkey anti-rabbit IgG conjugated to alexa-647 (Abcam, Cat# ab150075). After staining, cells  
436 were washed twice with FACS buffer and then strained using a 40  $\mu$ m cell strainer. Cells were  
437 analyzed by flow cytometry (BioRad ZE5 Cell Analyzer). As previously described<sup>7</sup>, we use the  
438 EasyFlow Matlab-based software package developed by Yaron Antebi to process the flow  
439 cytometry data.



440 For analysis, we selected and compared cells with the highest expression of the co-  
441 transfection marker, which was typically mCherry. This was done to have the largest separation  
442 between basal reporter autofluorescence from cellular autofluorescence, as previously  
443 described<sup>7,26</sup>. For experiments using the Kir2.1 potassium channel, cells were either co-  
444 transfected with the voltage indicator ASAP3<sup>54</sup> or incubated with the Oxonol chemical dye,  
445 DiSBAC<sub>2</sub>(3) as previously described<sup>55</sup>. The N-terminus of Kir2.1 was fused with mCherry, which  
446 acted as a co-transfection marker. After gating on cells with high expression of Kir2.1, the  
447 median fluorescence intensity was used to estimate changes in membrane potential<sup>55</sup>.

448

449 **Statistical analysis:**

450 Values are reported as the means from at least 3 biological replicates, which was  
451 representative from two independent biological experiments. For experiments comparing two  
452 groups, an unpaired Student's *t*-test was used to assess significance, following confirmation that  
453 equal variance could be assumed (*F*-test). If equal variance could not be assumed, then a  
454 Welch's correction was used. For experiments comparing three or more groups, a one-way  
455 ANOVA with a post hoc Tukey test was used to compare the means among the different  
456 experimental groups. Data were considered statistically significant at a *p* value of 0.05. Data are  
457 presented as average ± SEM, unless otherwise stated. All statistical analysis was performed  
458 using Prism 7.0 (GraphPad).

459

460 **Data Availability:**

461 All data reported in this paper are available from the corresponding author on request.

462

463

464

465

466

467

468

469 **Figures:**

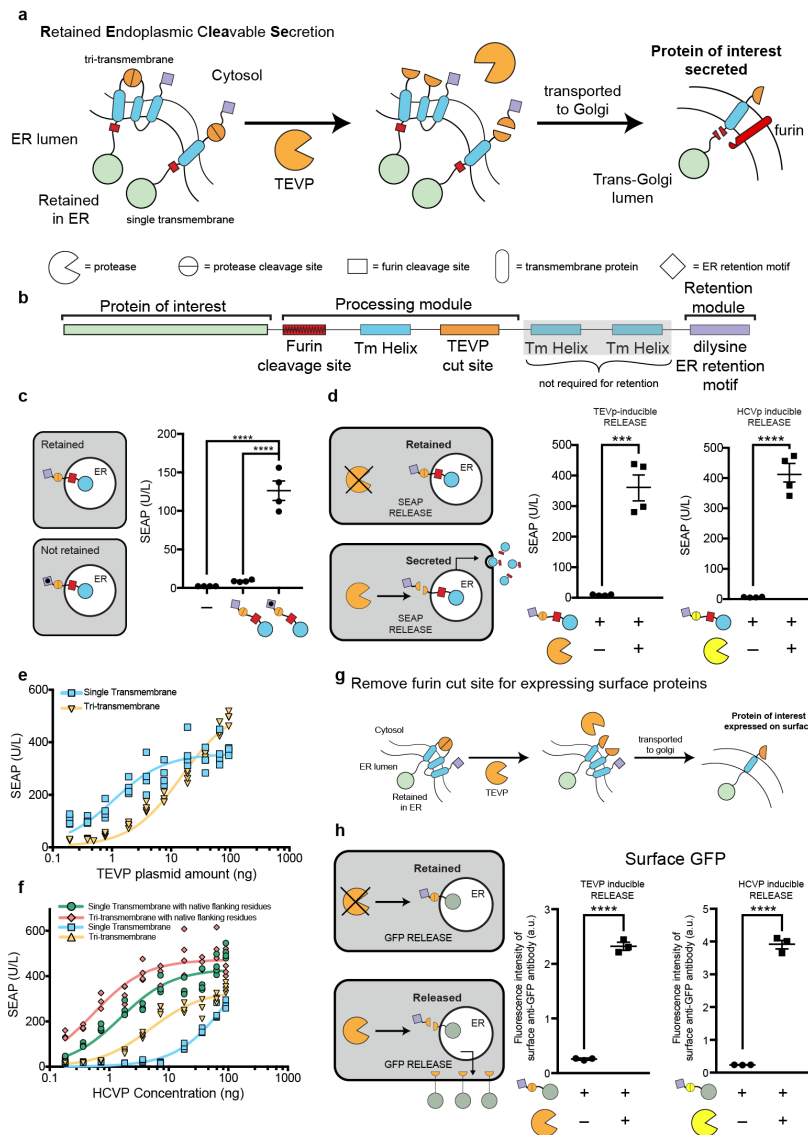

470  
471 **Figure 1: Design of Retained Endoplasmic Retained Secretion (RELEASE).** a) Proteins of  
472 interest are fused to RELEASE and retained in the ER via the dilysine ER retention domain  
473 (purple diamond). Upon activation or expression of a protease such as TEVP (orange partial  
474 circle), the ER retention domain is removed (middle panel) and the protein of interest is  
475 transported through the constitutive secretory pathway. When reaching the Trans-Golgi  
476 Apparatus (right panel), the native furin endoprotease cleaves the linker region allowing the  
477 membrane-bound protein to be secreted. b) RELEASE is a modular platform and can be  
478 modified to respond to different proteases and regulate different proteins of interest. c) The C-  
479 terminal dilysine motif of RELEASE is required for SEAP retention and mutation of the two  
480 lysine residues to alanines (KKXX-COOH → AAXX-COOH) increased SEAP secretion. There  
481 was no significant difference in signal between RELEASE and control cells without SEAP. d)  
482 Co-expression of proteases such as TEVP (orange partial circle), or HCVP (yellow partial circle)  
483 with the respective RELEASE constructs increased SEAP secretion. e) Single transmembrane  
484 and tri-transmembrane RELEASE constructs had different cleavage efficiencies to TEVP  
485 cleavage. f) The cleavage efficiencies of HCVP RELEASE constructs were also affected by  
486 transmembrane selection and was improved by modifying the residues flanking the HCVP cut

487 site with native linker proteins. Based on the steady-state solution of a kinetic model for  
488 proteolytic cleavage, we determined that the relation between RELEASE output and the amount  
489 of protease plasmids fits the Michaelis-Menten equation<sup>7</sup>. We therefore fit the titration curves  
490 using Michaelis-Menten equations and used  $K_m$  to represent the apparent cleavage efficiency of  
491 each design by its corresponding protease. A complete list of the calculated cleavage  
492 efficiencies for the different RELEASE constructs can be found in **Supplementary Table 1. g)**  
493 By removing the furin cut site, RELEASE was amenable to control the surface display of  
494 proteins. **h)** Increased surface display of membrane-bound GFP fused to RELEASE in response  
495 to TEVP (left panel) or HCVP (right panel). Each dot represents a biological replicate. Mean  
496 values were calculated from four (**c-f**) or three replicates (**h**). The error bars represent +/- SEM.  
497 The results are representative of at least two independent experiments; significance was tested  
498 using an unpaired two-tailed Student's *t*-test between the two indicated conditions for each  
499 experiment. For experiments with multiple conditions, a one-way ANOVA with a Tukey's post-  
500 hoc comparison test was used to assess significance. \*\*\* =  $p < 0.001$ , \*\*\*\* =  $p < 0.0001$   
501  
502  
503  
504

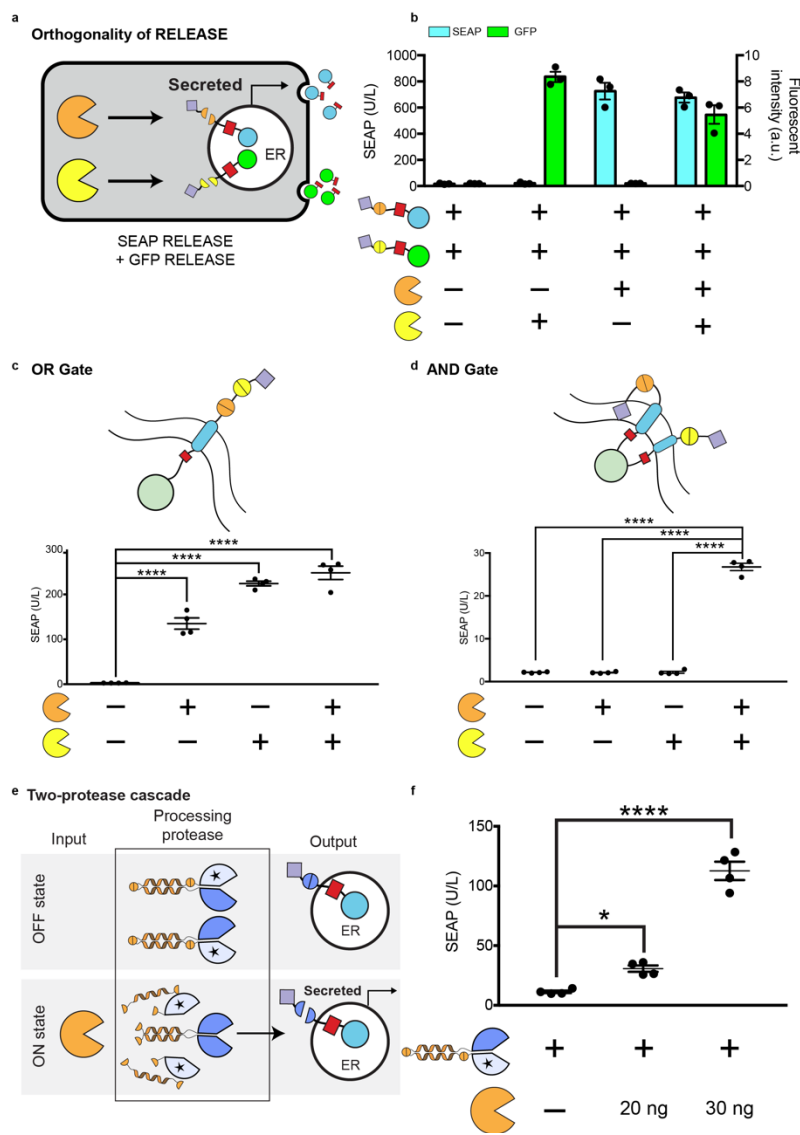

505  
 506 **Figure 2: RELEASE in circuits.** **a)** Orthogonal operation of RELEASE constructs. **b)** HEK293  
 507 cells were co-transfected with SEAP fused to RELEASE (responsive to TEVP) and GFP fused  
 508 to RELEASE (responsive to HCVP). SEAP and GFP levels increase in the supernatant when  
 509 the cognate protease was expressed. **c)** Tandem insertion of two protease cut sites (top panel)  
 510 created a RELEASE construct that implemented OR gate logic. If either of the respective  
 511 proteases were expressed, the dilysine ER retention motif would be removed, and SEAP would  
 512 be secreted. **d)** Implementation of AND logic by adding the N-terminal p450 signal anchor  
 513 sequence as a second ER retention domain, so that both proteases would have to be present to  
 514 remove both retention domains and allow SEAP to be secreted. **e)** A two-protease cascade was  
 515 created where TEVP was required to activate TVMVP, which subsequently cleaved SEAP  
 516 RELEASE. SEAP secretion increased when TEVP was expressed (right panel). Each dot  
 517 represents an individual biological replicate. Mean values were calculated from three (**b**) or four  
 518 replicates (**c-e**). Error bars represent +/- SEM. The results are representative of at least two  
 519 independent experiments; significance was tested by one-way ANOVA with a Tukey's post-hoc  
 520 comparison test among the multiple conditions. \* =  $p < 0.05$ , \*\*\* =  $p < 0.001$ , \*\*\*\* =  $p < 0.0001$   
 521

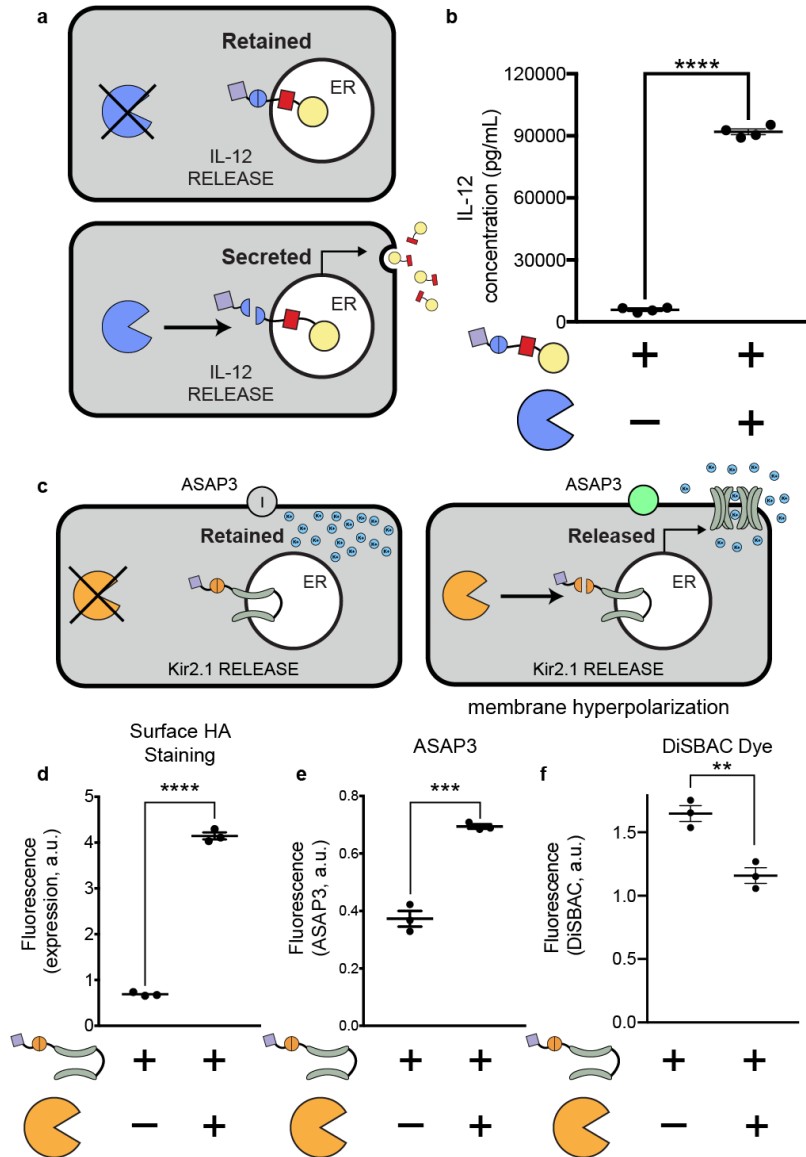

522  
523  
524  
525  
526  
527  
528  
529  
530  
531  
532  
533  
534  
535  
536  
537  
538

**Figure 3: Controlling bioactive proteins using RELEASE.** **a**) The cytokine IL-12 was fused to RELEASE and placed under the control of TVMVP. **b**) TVMVP significantly increase IL-12 secretion. **c**) The inwardly rectifying potassium channel Kir2.1 was fused to RELEASE. In addition, the genetically encoded voltage indicator ASAP3 was co-transfected. **d**) Co-expression of Kir2.1-RELEASE with TEVP resulted in a significant increase in the amount of Kir2.1 expressed on the surface, which was quantified using surface staining for HA and flow cytometry. The surface display of functional Kir2.1 in response to TVMVP was shown to cause hyperpolarization of transfected cells. This was validated by measuring change in the fluorescence intensity of the genetic reporter **e**) ASAP3, or the chemical dye, **f**) DiSBAC2(3). Each dot represents an individual biological replicate. Mean values were calculated from four **(b)** or three replicates **(d-f)**. Error bars represent +/- SEM. The results are representative of at least two independent experiments. Significance was tested using an unpaired two-tailed Student's *t*-test between the two indicated conditions for each experiment. \*\* =  $p < 0.01$ , \*\*\* =  $p < 0.001$ , \*\*\*\* =  $p < 0.0001$

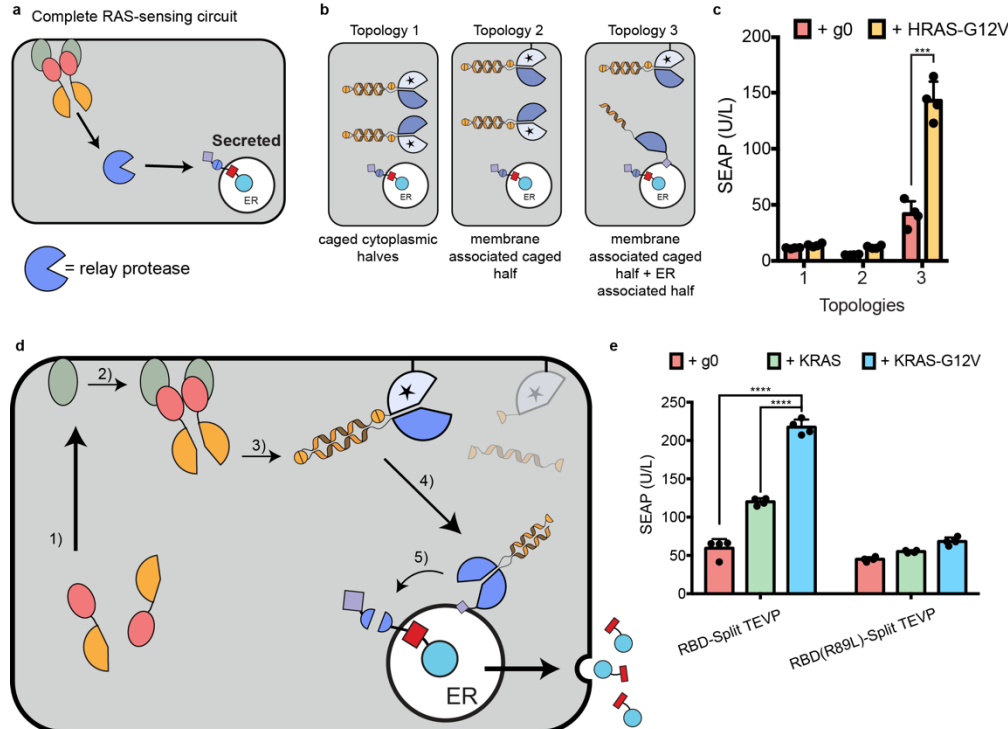

539  
540  
541  
542  
543  
544  
545  
546  
547  
548  
549  
550  
551  
552  
553  
554  
555  
556  
557  
558  
559  
560  
561  
562  
563  
564  
565  
566  
567  
568

**Figure 4: RAS-sensing circuit and protease replaying pathways to activate RELEASE. a)**

To sense active RAS, split TEVP was fused to the RBD domain of c-RAF. RBD-split TEVP binds to active RAS at the membrane surface of the cell where the two protease halves reassociated and reconstituted protease activity. Protease activation is propagated through an intermediate protease to relay the information from the cell membrane to the ER. **b)** Using protein localization motifs, three different topologies of intermediate protease components were created. Topology 1 uses two caged intermediate TVMVP protease halves in the cytosol. Topology 2 uses the same caged intermediate TVMVP, but with one half of the active protease localized to the membrane. Finally, Topology 3 has one half of the intermediate protease associated with the membrane, and the other half uncaged and present at the ER membrane via the p450 signal anchor sequence. The CC domain present on the uncaged TVMVP half (that was associated with the membrane) drives association with the complementary TVMVP half at the ER. **c)** There was a significant difference in the amount of SEAP secreted when using intermediate protease topology 3, with and without mutant HRAS-G12V, compared to topologies 1, and 2. **d)** Schematic of the signal processing of the complete KRAS-sensing circuit. The complete RAS-sensing circuit was activated by RBD-split TEVP interacting with active KRAS-G12V (1). The reconstituted TEV (2) then uncaged the membrane associated split TVMVP, releasing it from the membrane (3). The uncaged TVMVP contains a CC domain, which drives its association with the complementary CC domain present on the other split TVMVP half anchored to ER membrane (4). Finally, the reconstituted TVMVP cleaves the ER retention motif of RELEASE to secrete SEAP (5). **e)** Using the complete RAS-sensing circuit, we observed a significant increase in SEAP secretion when expressing an active mutant variant KRAS-G12V relative to baseline levels, or wildtype KRAS. This difference was not observed when using an RBD-Split TEVP containing the R89L mutation that reduced the association with active KRAS. Each dot represents an individual biological replicate. Mean values were calculated from four replicates (**c**, **e**). The error bars represent +/- SEM. The results are and representative of at least two independent experiments. Significance was tested using an unpaired two-tailed Student's *t*-test between the two indicated conditions for each experiment. \*\* =  $p < 0.01$ , \*\*\* =  $p < 0.001$ , \*\*\*\* =  $p < 0.0001$ .

569

**a** Engineering cells with protease-based circuits and RELEASE

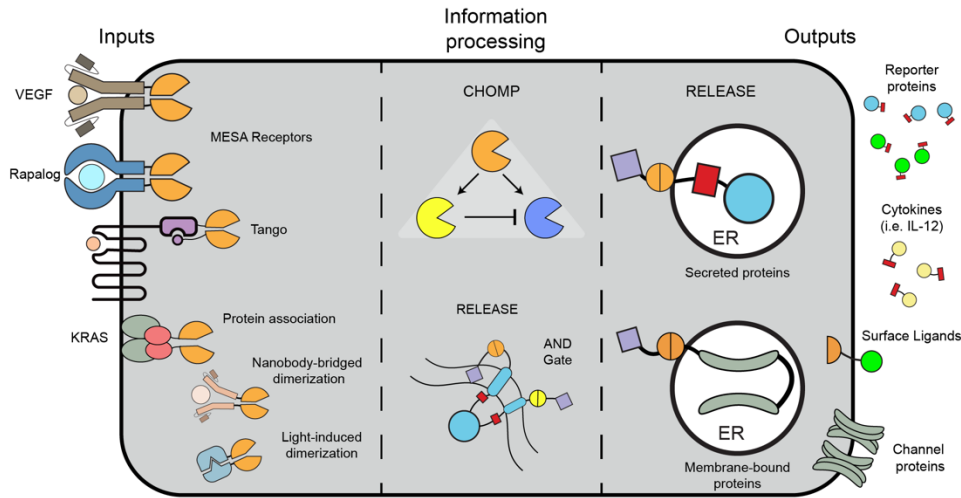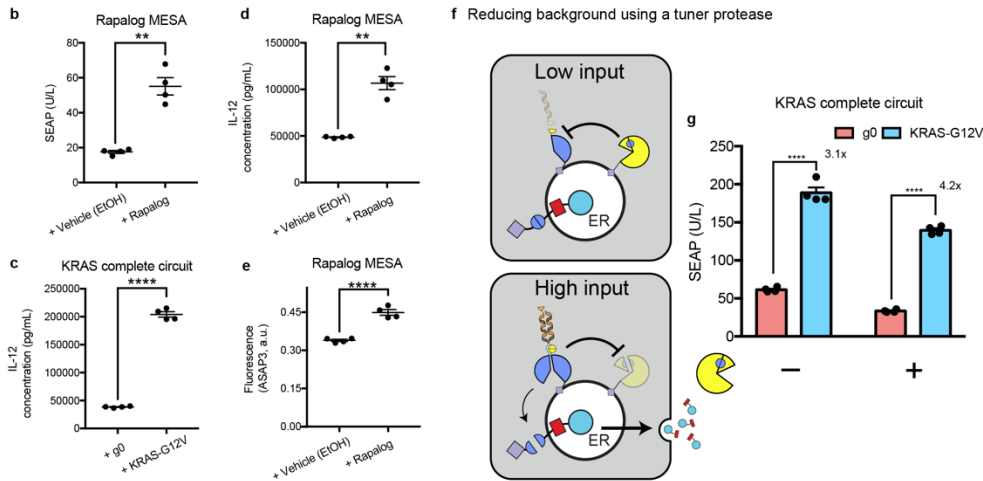

570

571

**Figure 5: Plug-and-play capabilities of RELEASE.** **a)** Any multimerization event, such as ligand-induced receptor dimerization (i.e. MESA receptors, or Tango), protein association, nanobody-bridged dimerization, or light-induced dimerization can be harnessed to reconstitute and activate split proteases. This information can then be processed using CHOMP circuits or even RELEASE itself to produce complex responses. Each component of the engineered can be optimized independently of each other and are not necessarily dependent on the input or output components. To highlight the plug-and-play capabilities of RELEASE, we tested different input and output combinations, while keeping the intermediate CHOMP circuit intact. **b)** Using the rapalog MESA receptor as the input, SEAP secretion was controlled. IL-12 secretion was induced by **c)** KRAS expression or induction with **d)** rapalog. **e)** We also observed Kir2.1-mediated hyperpolarization after induction with Rapalog. **f)** Schematic of CHOMP circuit containing reciprocal inhibition of TVMVP and HCVP to reduce background activity of RELEASE. When the amount of input is low, the ER-associated split TVMVP protease is repressed by the ER-associated HCVP through removing the complementary CC motif, reducing the association with the other split functional half. When the amount of input is high, fully reconstituted TVMVP will be present at higher levels and repress HCVP by removing the core HCVP from its activity-enhancing co-peptide (small yellow pie space). **g)** Addition of the tuner protease increased the dynamic range of the RAS-sensing circuit, by reducing baseline

590 secretion. Each dot represents an individual biological replicate. Mean values were calculated  
591 from four biological replicates (**b-e, g**). Error bars represent +/- SEM. The results are  
592 representative of at least two independent experiments. Significance was tested using an  
593 unpaired two-tailed Student's *t*-test between the two indicated conditions for each experiment. \*\*  
594 =  $p < 0.01$ , \*\*\*\* =  $p < 0.0001$ .

595  
596  
597  
598  
599  
600  
601  
602  
603  
604  
605  
606  
607  
608  
609  
610  
611  
612  
613  
614  
615  
616  
617  
618  
619  
620  
621  
622  
623  
624  
625  
626  
627  
628  
629  
630  
631  
632  
633  
634  
635  
636  
637  
638  
639  
640



641 **Supplementary Files:**

642

643 **Supplementary Figure Captions:**

644

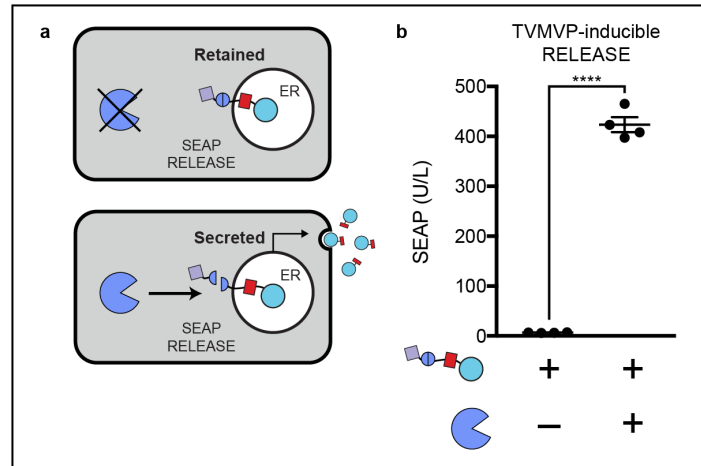

645

646 **Supplementary Figure 1: TVMVP-inducible RELEASE. a)** Schematic of TVMVP-inducible

647 RELEASE for controlling protein secretion. **b)** SEAP was fused to a TVMVP-inducible

648 RELEASE, and co-expression with TVMVP secreted more SEAP. Each dot represents a

649 biological replicate. Mean values were calculated from four biological replicates **(b)** +/- SEM.

650 The results are representative of at least two independent experiments; significance was tested

651 using an unpaired two-tailed Student's *t*-test between the two indicated conditions. \*\*\*\* =  $p <$

652 0.0001.

653

654

655

656

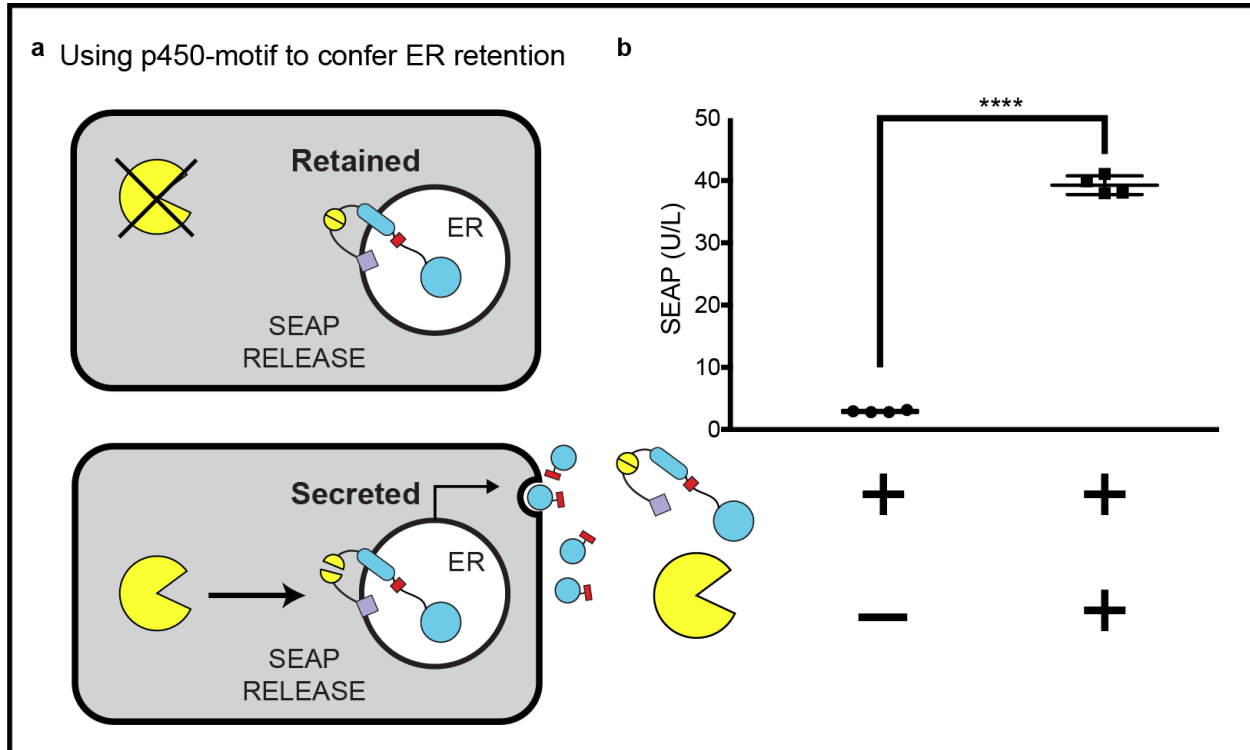

657  
658  
659  
660  
661  
662  
663  
664  
665  
666  
667  
668  
669  
670  
671

**Supplementary Figure 2:** An alternative ER-retention domain to create RELEASE. **a)** Schematic of RELEASE using the N-terminal signal anchor sequence of cytochrome p450 to control protein secretion. **b)** When co-expressed with HCVP, SEAP secretion increased relative to when the HCVP was absent. Each dot represents a biological replicate. Mean values were calculated from four biological replicates (**b**) +/- SEM. The results are representative of at least two independent experiments; significance was tested using an unpaired two-tailed Student's *t*-test between the two indicated conditions for each experiment. \*\*\*\* =  $p < 0.0001$ .

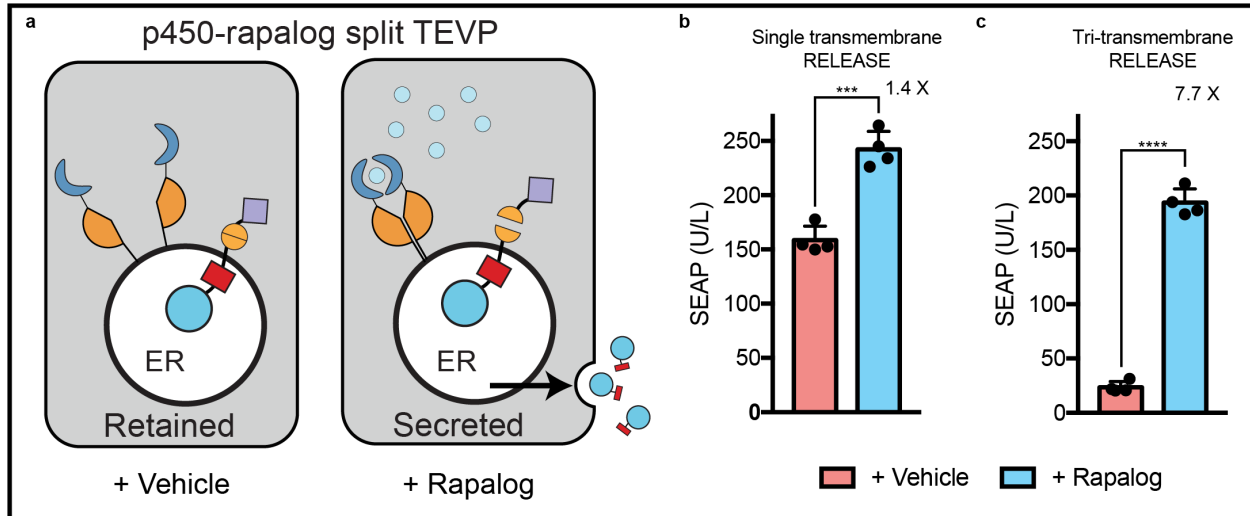

672  
673 **Supplementary Figure 3:** Dynamic range of RELEASE is increased by using different  
674 RELEASE constructs that have different cleavage efficiencies. **a)** Schematic of rapalog-  
675 inducible split TEVP localized to the ER membrane via the p450 signal anchor sequence. When  
676 rapalog is present, split TEVP will be reconstituted to cleave SEAP RELEASE. **b)** With the  
677 single transmembrane RELEASE construct, there was a minor increase in the SEAP secretion  
678 after induction with rapalog relative to the control. **c)** Using the tri-transmembrane RELEASE  
679 construct there was a greater difference in SEAP secretion compared to the single  
680 transmembrane RELEASE construct (7.7-fold vs. 1.4-fold). The difference between the fold-  
681 changes was attributed to the reduction in SEAP secretion under basal conditions with the tri-  
682 transmembrane RELEASE. Each dot represents a biological replicate. Mean values were  
683 calculated from four biological replicates (**b, c**) +/- SEM. The results are representative of at  
684 least two independent experiments; significance was tested using an unpaired two-tailed  
685 Student's *t*-test between the two indicated conditions for each experiment. \*\*\* =  $p < 0.001$ , \*\*\*\* =  
686  $p < 0.0001$   
687

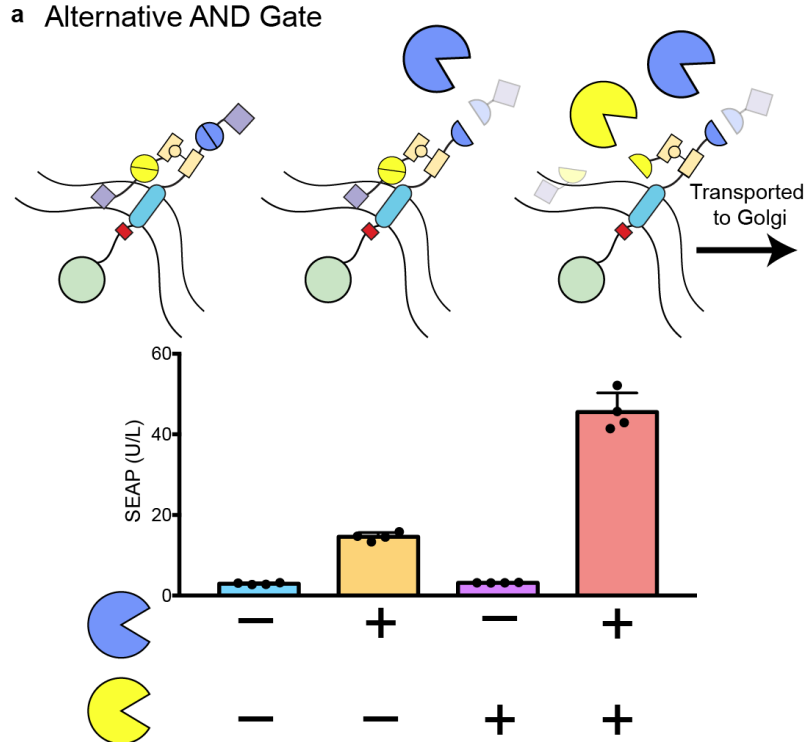

688  
689  
690  
691  
692  
693  
694  
695  
696  
697

**Supplementary Figure 4:** An alternative AND gate was implemented using the SpyTag/SpyCatcher peptide-protein pair. HCVP inducible SpyCatcher was localized to the ER using the signal anchor sequence of p450. A TVMVP inducible RELEASE construct containing an internal SpyTag peptide within the cytoplasmic linker region rapidly associated with the ER-retained SpyCatcher. SEAP secretion was dependent on the expression of both HCVP and TVMVP, however some SEAP was secreted when co-expressing TVMVP alone, which may be due to an incomplete reaction with SpyCatcher. Each dot represents a biological replicate. Mean values were calculated from four biological replicates (b) +/- SEM. The results are representative of at least two independent experiments.

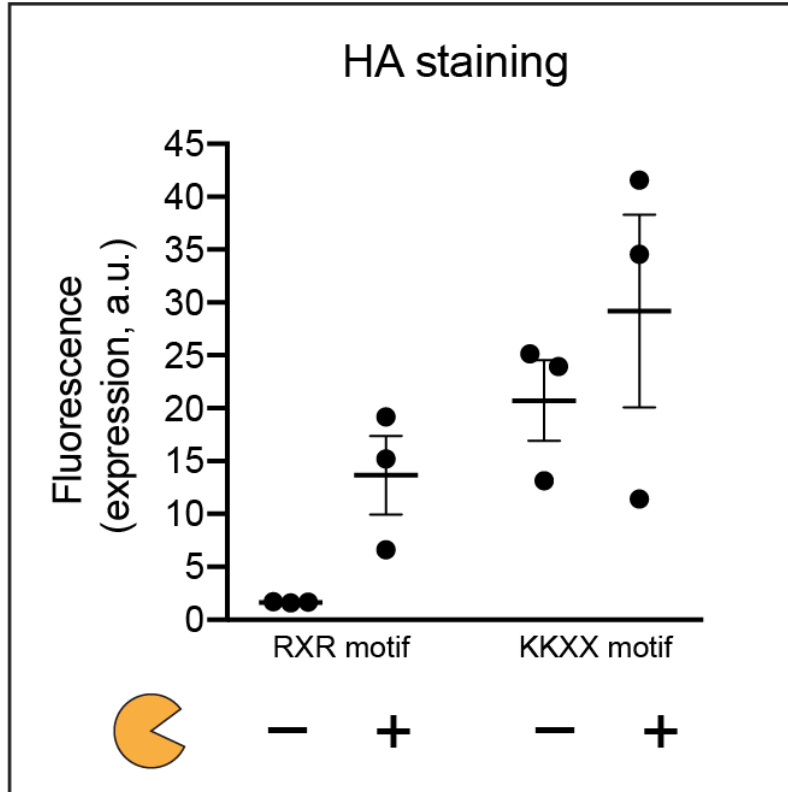

698  
699  
700  
701  
702  
703  
704  
705  
706  
707  
708

**Supplementary Figure 5:** Surface display of Kir2.1 was dependent on the ER retention motif used in the RELEASE construct. Due to the large cytoplasmic tail of Kir2.1, the C-terminal was farther away from the ER membrane relative to other RELEASE constructs. The RXR motif retains proteins better than the KKXX motif when the C-terminal is distal to ER membrane. Each dot represents a biological replicate. Mean values were calculated from four biological replicates (b) +/- SEM. The results are representative of at least two independent experiments.

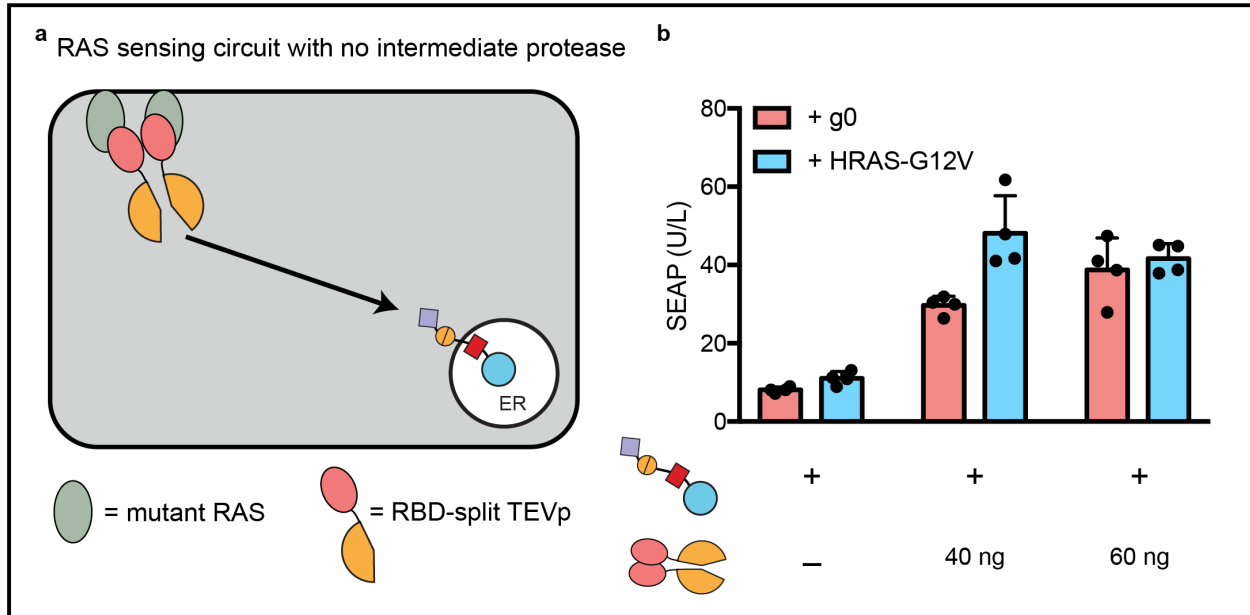

709  
710  
711  
712  
713  
714  
715  
716  
717  
718

**Supplementary Figure 6: a)** Schematic of RAS-sensing circuit without using intermediate protease to propagate the signal. **b)** The sensing of active mutant HRAS-G12V at the membrane using RBD-split TEVP did not result in a significant increase in the amount of SEAP secretion, relative to cells not containing mutant HRAS. Each dot represents a biological replicate. Mean values were calculated from four biological replicates (**b**) +/- SEM. The results are representative of at least two independent experiments.

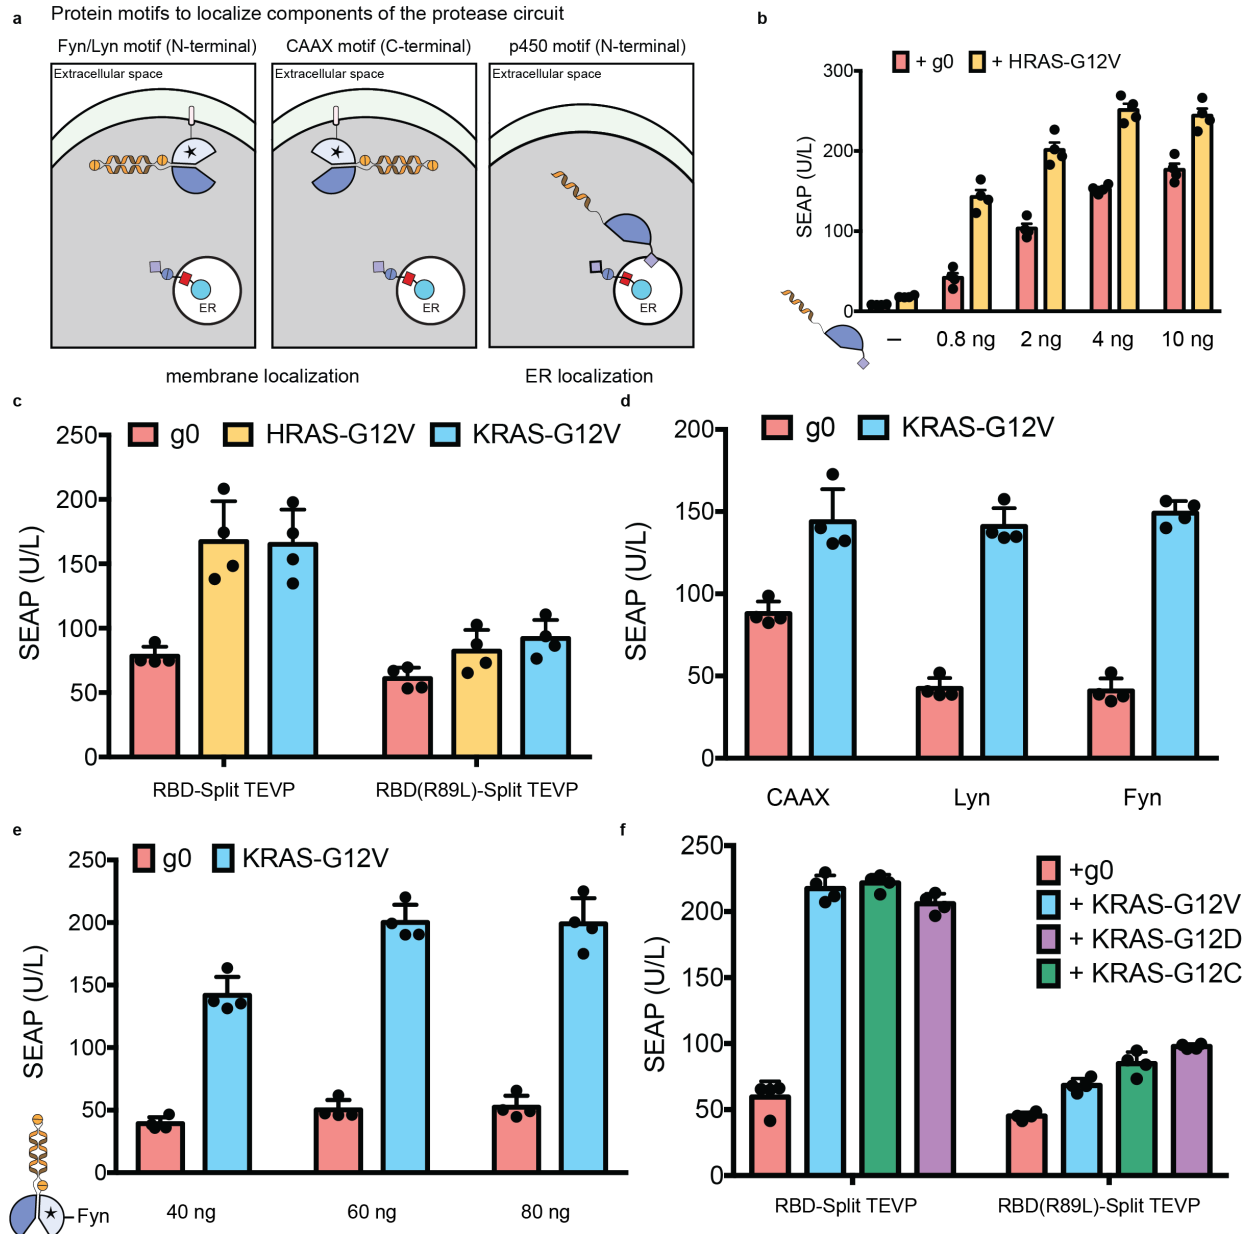

719  
 720 **Supplementary Figure 7: a)** To efficiently propagate information from the cell membrane to the  
 721 ER, signalling motifs were incorporated to localize components of the intermediate protease to  
 722 the membrane via the Fyn/Lyn motif (left panel), or CAAX motif (middle panel). In addition, we  
 723 used the signal anchor sequence of cytochrome p450 to localize components to the ER  
 724 membrane (right panel). **b)** To increase the dynamic range of the RAS-sensing circuit (topology  
 725 3 from **Fig. 4d**), the amount of the ER-localized split TVMVP was reduced. **c)** The RAS-sensing  
 726 circuit was comparable for sensing other RAS isoforms, such as KRAS-G12V. **d)** The Fyn and  
 727 Lyn membrane associating motifs had reduced background relative to the CAAX motif, and **e)**  
 728 increasing the amount of the membrane-associated TVMVP half localized with the Fyn motif,  
 729 improved the dynamic range. **f)** The RAS-sensing circuit sensed other active mutants of KRAS  
 730 at comparable levels to the KRAS-G12V mutant. Each dot represents a biological replicate.  
 731 Mean values were calculated from four biological replicates (**b-f**) +/- SEM. The results are  
 732 representative of at least two independent experiments; significance was tested using an

733 unpaired two-tailed Student's *t*-test between the two indicated conditions for each experiment. \*\*  
 734 =  $p < 0.01$ , \*\*\* =  $p < 0.001$ , \*\*\*\* =  $p < 0.0001$ .

735  
 736  
 737

| <u>RELEASE Plasmid</u>                | <u>Protease Cut Site</u> | <u>Apparent Cleavage Efficiency (amount (ng) of plasmid to achieve <math>\frac{1}{2}</math> Vmax) +/- S.E.</u> |
|---------------------------------------|--------------------------|----------------------------------------------------------------------------------------------------------------|
| CMVTO-SEAP-26Sfur-3TM-tevs-KKMP       | TEVP                     | 15.8 ± 1.6                                                                                                     |
| CMVTO-SEAP-26Sfur-B2AD-tevs-KKMP      | TEVP                     | 1.1 ± 0.2                                                                                                      |
| CMVTO-SEAP-26Sfur-3TM-hcvs-KKMP       | HCVP                     | 0.6 ± 0.1                                                                                                      |
| CMVTO-SEAP-26Sfur-B2AD-hcvs-KKMP      | HCVP                     | 1.7 ± 0.2                                                                                                      |
| CMVTO-SEAP-26Sfur-3TM-hcvs-KKMP (GS)  | HCVP                     | 5.5 ± 0.7                                                                                                      |
| CMVTO-SEAP-26Sfur-B2AD-hcvs-KKMP (GS) | HCVP                     | 113.9 ± 25.2                                                                                                   |
| CMVTO-SEAP-26Sfur-B2AD-tvmvs-KKMP     | TVMVP                    | 7.7 ± 0.9                                                                                                      |

738  
 739 **Supplementary Table 1: Apparent cleavage efficiencies of different RELEASE constructs**  
 740 **used in this study.** The apparently cleavage efficiencies of different RELEASE constructs were  
 741 calculated by performing non-linear regression using the Michaelis-Menten equation. The  
 742 cleavage efficiencies were represented by the  $K_m$  calculated from the fitted line. All non-linear  
 743 regression was calculated using Prism 7.0.

744  
 745 **Supplementary Table 2:** List of plasmids and the amounts use in this study.

746  
 747 Please see attached excel file.  
 748



749 **Bibliography**

- 750
- 751 1. Cheng, A. A. & Lu, T. K. Synthetic biology: an emerging engineering discipline. *Annu. Rev.*  
752 *Biomed. Eng.* **14**, 155–178 (2012).
- 753 2. Lim, W. A. Designing customized cell signalling circuits. *Nat. Rev. Mol. Cell Biol.* **11**, 393–  
754 403 (2010).
- 755 3. Siciliano, V. *et al.* Engineering modular intracellular protein sensor-actuator devices. *Nat.*  
756 *Commun.* **9**, 1881 (2018).
- 757 4. Chen, Z. & Elowitz, M. B. Programmable protein circuit design. *Cell* **184**, 2284–2301  
758 (2021).
- 759 5. Chen, Z. *et al.* Programmable design of orthogonal protein heterodimers. *Nature* **565**, 106–  
760 111 (2019).
- 761 6. Fink, T. *et al.* Design of fast proteolysis-based signaling and logic circuits in mammalian  
762 cells. *Nat. Chem. Biol.* **15**, 115–122 (2019).
- 763 7. Gao, X. J., Chong, L. S., Kim, M. S. & Elowitz, M. B. Programmable protein circuits in  
764 living cells. *Science* **361**, 1252–1258 (2018).
- 765 8. Kojima, R. & Fussenegger, M. Synthetic Biology: Engineering Mammalian Cells To  
766 Control Cell-to-Cell Communication at Will. *Chembiochem* **20**, 994–1002 (2019).
- 767 9. Buddingh', B. C., Elzinga, J. & van Hest, J. C. M. Intercellular communication between  
768 artificial cells by allosteric amplification of a molecular signal. *Nat. Commun.* **11**, 1652  
769 (2020).
- 770 10. Thurley, K., Wu, L. F. & Altschuler, S. J. Modeling Cell-to-Cell Communication Networks  
771 Using Response-Time Distributions. *Cell Syst.* **6**, 355–367.e5 (2018).
- 772 11. Thurley, K., Gerecht, D., Friedmann, E. & Höfer, T. Three-Dimensional Gradients of  
773 Cytokine Signaling between T Cells. *PLoS Comput. Biol.* **11**, e1004206 (2015).
- 774 12. Francisco, L. M., Sage, P. T. & Sharpe, A. H. The PD-1 pathway in tolerance and  
775 autoimmunity. *Immunol. Rev.* **236**, 219–242 (2010).
- 776 13. Glen, C. M., McDevitt, T. C. & Kemp, M. L. Dynamic intercellular transport modulates the  
777 spatial patterning of differentiation during early neural commitment. *Nat. Commun.* **9**, 4111  
778 (2018).
- 779 14. Lander, A. D. How cells know where they are. *Science* **339**, 923–927 (2013).
- 780 15. Li, P. *et al.* Morphogen gradient reconstitution reveals Hedgehog pathway design principles.  
781 *Science* **360**, 543–548 (2018).
- 782 16. Röder, P. V., Wu, B., Liu, Y. & Han, W. Pancreatic regulation of glucose homeostasis. *Exp*  
783 *Mol Med* **48**, e219 (2016).
- 784 17. Sever, R. & Brugge, J. S. Signal transduction in cancer. *Cold Spring Harb. Perspect. Med.*  
785 **5**, (2015).
- 786 18. Barcellos-Hoff, M. H., Lyden, D. & Wang, T. C. The evolution of the cancer niche during  
787 multistage carcinogenesis. *Nat. Rev. Cancer* **13**, 511–518 (2013).
- 788 19. Nissim, L. *et al.* Synthetic RNA-Based Immunomodulatory Gene Circuits for Cancer  
789 Immunotherapy. *Cell* **171**, 1138–1150.e15 (2017).
- 790 20. Frangogiannis, N. Transforming growth factor- $\beta$  in tissue fibrosis. *J. Exp. Med.* **217**,  
791 e20190103 (2020).
- 792 21. Subramanian, N., Torabi-Parizi, P., Gottschalk, R. A., Germain, R. N. & Dutta, B. Network  
793 representations of immune system complexity. *Wiley Interdiscip Rev Syst Biol Med* **7**, 13–38  
794 (2015).
- 795 22. Jin, Q., Liu, Z. & Chen, Q. Controlled release of immunotherapeutics for enhanced cancer

- 796 immunotherapy after local delivery. *J. Control. Release* **329**, 882–893 (2021).
- 797 23. Caster, J. M. *et al.* Optimizing advances in nanoparticle delivery for cancer immunotherapy.  
798 *Adv. Drug Deliv. Rev.* **144**, 3–15 (2019).
- 799 24. Ishihara, J. *et al.* Targeted antibody and cytokine cancer immunotherapies through collagen  
800 affinity. *Sci. Transl. Med.* **11**, (2019).
- 801 25. Schwarz, K. A., Daringer, N. M., Dolberg, T. B. & Leonard, J. N. Rewiring human cellular  
802 input-output using modular extracellular sensors. *Nat. Chem. Biol.* **13**, 202–209 (2017).
- 803 26. Edelstein, H. I. *et al.* Elucidation and refinement of synthetic receptor mechanisms. *Synth*  
804 *Biol (Oxf)* **5**, ysaa017 (2020).
- 805 27. Wang, W. *et al.* A light- and calcium-gated transcription factor for imaging and  
806 manipulating activated neurons. *Nat. Biotechnol.* **35**, 864–871 (2017).
- 807 28. Barnea, G. *et al.* The genetic design of signaling cascades to record receptor activation.  
808 *Proc. Natl. Acad. Sci. USA* **105**, 64–69 (2008).
- 809 29. Bräuer, P. *et al.* Structural basis for pH-dependent retrieval of ER proteins from the Golgi by  
810 the KDEL receptor. *Science* **363**, 1103–1107 (2019).
- 811 30. Ma, W. & Goldberg, J. Rules for the recognition of dilysine retrieval motifs by coatomer.  
812 *EMBO J.* **32**, 926–937 (2013).
- 813 31. Teasdale, R. D. & Jackson, M. R. Signal-mediated sorting of membrane proteins between  
814 the endoplasmic reticulum and the golgi apparatus. *Annu. Rev. Cell Dev. Biol.* **12**, 27–54  
815 (1996).
- 816 32. Jackson, L. P. *et al.* Molecular basis for recognition of dilysine trafficking motifs by COPI.  
817 *Dev. Cell* **23**, 1255–1262 (2012).
- 818 33. Zerangue, N. *et al.* Analysis of endoplasmic reticulum trafficking signals by combinatorial  
819 screening in mammalian cells. *Proc. Natl. Acad. Sci. USA* **98**, 2431–2436 (2001).
- 820 34. Shikano, S. & Li, M. Membrane receptor trafficking: evidence of proximal and distal zones  
821 conferred by two independent endoplasmic reticulum localization signals. *Proc. Natl. Acad.*  
822 *Sci. USA* **100**, 5783–5788 (2003).
- 823 35. Jackson, M. R., Nilsson, T. & Peterson, P. A. Identification of a consensus motif for  
824 retention of transmembrane proteins in the endoplasmic reticulum. *EMBO J.* **9**, 3153–3162  
825 (1990).
- 826 36. Park, J. W., Reed, J. R., Brignac-Huber, L. M. & Backes, W. L. Cytochrome P450 system  
827 proteins reside in different regions of the endoplasmic reticulum. *Biochem. J.* **464**, 241–249  
828 (2014).
- 829 37. Szczesna-Skorupa, E. & Kemper, B. Endoplasmic reticulum retention determinants in the  
830 transmembrane and linker domains of cytochrome P450 2C1. *J. Biol. Chem.* **275**, 19409–  
831 19415 (2000).
- 832 38. Pacini, L., Bartholomew, L., Vitelli, A. & Migliaccio, G. Reporter substrates for assessing  
833 the activity of the hepatitis C virus NS3-4A serine protease in living cells. *Anal. Biochem.*  
834 **331**, 46–59 (2004).
- 835 39. Cole, N. B., Ellenberg, J., Song, J., DiEuliis, D. & Lippincott-Schwartz, J. Retrograde  
836 transport of Golgi-localized proteins to the ER. *J. Cell Biol.* **140**, 1–15 (1998).
- 837 40. Girod, A. *et al.* Evidence for a COP-I-independent transport route from the Golgi complex  
838 to the endoplasmic reticulum. *Nat. Cell Biol.* **1**, 423–430 (1999).
- 839 41. Molloy, S. S., Anderson, E. D., Jean, F. & Thomas, G. Bi-cycling the furin pathway: from  
840 TGN localization to pathogen activation and embryogenesis. *Trends Cell Biol.* **9**, 28–35  
841 (1999).

- 842 42. Scheller, L., Strittmatter, T., Fuchs, D., Bojar, D. & Fussenegger, M. Generalized  
843 extracellular molecule sensor platform for programming cellular behavior. *Nat. Chem. Biol.*  
844 **14**, 723–729 (2018).
- 845 43. Urbani, A. *et al.* Substrate specificity of the hepatitis C virus serine protease NS3. *J. Biol.*  
846 *Chem.* **272**, 9204–9209 (1997).
- 847 44. Dolberg, T. B. *et al.* Computation-guided optimization of split protein systems. *BioRxiv*  
848 (2019). doi:10.1101/863530
- 849 45. Zakeri, B. *et al.* Peptide tag forming a rapid covalent bond to a protein, through engineering  
850 a bacterial adhesin. *Proc. Natl. Acad. Sci. USA* **109**, E690-7 (2012).
- 851 46. Keeble, A. H. *et al.* Approaching infinite affinity through engineering of peptide-protein  
852 interaction. *Proc. Natl. Acad. Sci. USA* (2019). doi:10.1073/pnas.1909653116
- 853 47. Henry, C. J., Ornelles, D. A., Mitchell, L. M., Brzoza-Lewis, K. L. & Hiltbold, E. M. IL-12  
854 produced by dendritic cells augments CD8+ T cell activation through the production of the  
855 chemokines CCL1 and CCL17. *J. Immunol.* **181**, 8576–8584 (2008).
- 856 48. Vacaflares, A., Chapman, N. M., Harty, J. T., Richer, M. J. & Houtman, J. C. D. Exposure  
857 of Human CD4 T Cells to IL-12 Results in Enhanced TCR-Induced Cytokine Production,  
858 Altered TCR Signaling, and Increased Oxidative Metabolism. *PLoS One* **11**, e0157175  
859 (2016).
- 860 49. Babik, J. M. *et al.* Expression of murine IL-12 is regulated by translational control of the  
861 p35 subunit. *J. Immunol.* **162**, 4069–4078 (1999).
- 862 50. Chen, X., Zaro, J. L. & Shen, W.-C. Fusion protein linkers: property, design and  
863 functionality. *Adv. Drug Deliv. Rev.* **65**, 1357–1369 (2013).
- 864 51. Gradinaru, V. *et al.* Molecular and cellular approaches for diversifying and extending  
865 optogenetics. *Cell* **141**, 154–165 (2010).
- 866 52. Auffenberg, E. *et al.* Remote and reversible inhibition of neurons and circuits by small  
867 molecule induced potassium channel stabilization. *Sci. Rep.* **6**, 19293 (2016).
- 868 53. Miake, J., Marbán, E. & Nuss, H. B. Functional role of inward rectifier current in heart  
869 probed by Kir2.1 overexpression and dominant-negative suppression. *J. Clin. Invest.* **111**,  
870 1529–1536 (2003).
- 871 54. Villette, V. *et al.* Ultrafast Two-Photon Imaging of a High-Gain Voltage Indicator in Awake  
872 Behaving Mice. *Cell* **179**, 1590–1608.e23 (2019).
- 873 55. Shapiro, H. M. Estimation of membrane potential by flow cytometry. *Curr. Protoc. Cytom.*  
874 **Chapter 9**, Unit 9.6 (2004).
- 875 56. Baxter, D. F. *et al.* A novel membrane potential-sensitive fluorescent dye improves cell-  
876 based assays for ion channels. *J. Biomol. Screen.* **7**, 79–85 (2002).
- 877 57. Eser, S., Schnieke, A., Schneider, G. & Saur, D. Oncogenic KRAS signalling in pancreatic  
878 cancer. *Br. J. Cancer* **111**, 817–822 (2014).
- 879 58. Collins, M. A. & Pasca di Magliano, M. Kras as a key oncogene and therapeutic target in  
880 pancreatic cancer. *Front. Physiol.* **4**, 407 (2013).
- 881 59. Waters, A. M. & Der, C. J. KRAS: the critical driver and therapeutic target for pancreatic  
882 cancer. *Cold Spring Harb. Perspect. Med.* **8**, (2018).
- 883 60. Riely, G. J., Marks, J. & Pao, W. KRAS mutations in non-small cell lung cancer. *Proc Am*  
884 *Thorac Soc* **6**, 201–205 (2009).
- 885 61. Ryan, M. B. & Corcoran, R. B. Therapeutic strategies to target RAS-mutant cancers. *Nat.*  
886 *Rev. Clin. Oncol.* **15**, 709–720 (2018).
- 887 62. Cox, A. D., Fesik, S. W., Kimmelman, A. C., Luo, J. & Der, C. J. Drugging the undruggable

- 888 RAS: Mission possible? *Nat. Rev. Drug Discov.* **13**, 828–851 (2014).
- 889 63. Moore, A. R., Rosenberg, S. C., McCormick, F. & Malek, S. RAS-targeted therapies: is the  
890 undruggable drugged? *Nat. Rev. Drug Discov.* **19**, 533–552 (2020).
- 891 64. Li, Y.-C. *et al.* Analysis of RAS protein interactions in living cells reveals a mechanism for  
892 pan-RAS depletion by membrane-targeted RAS binders. *Proc. Natl. Acad. Sci. USA* **117**,  
893 12121–12130 (2020).
- 894 65. Downward, J. Targeting RAS signalling pathways in cancer therapy. *Nat. Rev. Cancer* **3**,  
895 11–22 (2003).
- 896 66. Shields, J. M., Pruitt, K., McFall, A., Shaub, A. & Der, C. J. Understanding Ras: 'it ain't  
897 over 'til it's over". *Trends Cell Biol.* **10**, 147–154 (2000).
- 898 67. Tran, T. H. *et al.* KRAS interaction with RAF1 RAS-binding domain and cysteine-rich  
899 domain provides insights into RAS-mediated RAF activation. *Nat. Commun.* **12**, 1176  
900 (2021).
- 901 68. Hancock, J. F., Cadwallader, K., Paterson, H. & Marshall, C. J. A CAAX or a CAAL motif  
902 and a second signal are sufficient for plasma membrane targeting of ras proteins. *EMBO J.*  
903 **10**, 4033–4039 (1991).
- 904 69. Hobbs, G. A., Der, C. J. & Rossman, K. L. RAS isoforms and mutations in cancer at a  
905 glance. *J. Cell Sci.* **129**, 1287–1292 (2016).
- 906 70. Nakhaeizadeh, H., Amin, E., Nakhaei-Rad, S., Dvorsky, R. & Ahmadian, M. R. The RAS-  
907 Effector Interface: Isoform-Specific Differences in the Effector Binding Regions. *PLoS One*  
908 **11**, e0167145 (2016).
- 909 71. Ahearn, I. M., Haigis, K., Bar-Sagi, D. & Philips, M. R. Regulating the regulator: post-  
910 translational modification of RAS. *Nat. Rev. Mol. Cell Biol.* **13**, 39–51 (2012).
- 911 72. Sato, I. *et al.* Differential trafficking of Src, Lyn, Yes and Fyn is specified by the state of  
912 palmitoylation in the SH4 domain. *J. Cell Sci.* **122**, 965–975 (2009).
- 913 73. Daringer, N. M., Dudek, R. M., Schwarz, K. A. & Leonard, J. N. Modular extracellular  
914 sensor architecture for engineering mammalian cell-based devices. *ACS Synth. Biol.* **3**, 892–  
915 902 (2014).
- 916 74. Djannatian, M. S., Galinski, S., Fischer, T. M. & Rossner, M. J. Studying G protein-coupled  
917 receptor activation using split-tobacco etch virus assays. *Anal. Biochem.* **412**, 141–152  
918 (2011).
- 919 75. Bethuynne, J. *et al.* A nanobody modulates the p53 transcriptional program without  
920 perturbing its functional architecture. *Nucleic Acids Res.* **42**, 12928–12938 (2014).
- 921 76. Kowalski, P. S., Rudra, A., Miao, L. & Anderson, D. G. Delivering the Messenger:  
922 Advances in Technologies for Therapeutic mRNA Delivery. *Mol. Ther.* **27**, 710–728 (2019).
- 923 77. Li, M.-C. & He, S.-H. IL-10 and its related cytokines for treatment of inflammatory bowel  
924 disease. *World J. Gastroenterol.* **10**, 620–625 (2004).
- 925 78. Clackson, T. *et al.* Redesigning an FKBP-ligand interface to generate chemical dimerizers  
926 with novel specificity. *Proc. Natl. Acad. Sci. USA* **95**, 10437–10442 (1998).
- 927
